# Supplementary material for: Enabling highly stable lithium metal batteries by using dual-function additive catalyzed in-built quasi-solid-state polymer electrolytes
Source: Royal Society of Chemistry journal article supplement (doi:10.1039/d2ta06153h), 2022-01-01
Supplement: d2ta06153h1.pdf [file d2ta06153h1.pdf]

## Supporting Information

### Enabling Highly Stable Lithium Metal Battery by Dual-function Additive Catalyzed In-Built Quasi-Solid-State Polymer Electrolytes

Zhenchao Li <sup>a, †</sup>, Wenhao Tang <sup>b †</sup>, Yirui Deng <sup>b</sup>, Miaomiao Zhou <sup>b</sup>, Xiaodong Wang <sup>a</sup>,  
Ruiping Liu, <sup>a, b</sup> \* and Chang-an Wang <sup>c</sup> \*

<sup>a</sup> Department of Materials Science and Engineering, China University of Mining & Technology (Beijing), Beijing, 100083, PR China

<sup>b</sup> School of Chemical & Environmental Engineering, China University of Mining and Technology (Beijing), Beijing 100083, P. R. China

<sup>c</sup> State Key Laboratory of New Ceramics and Fine Processing, School of Materials Science and Engineering, Tsinghua University, Beijing 100084, P. R. China

<sup>†</sup> Contributed equally to this work.

\* Corresponding author. [lrp@cumtb.edu.cn](mailto:lrp@cumtb.edu.cn) (R. Liu); [wangca@mail.tsinghua.edu.cn](mailto:wangca@mail.tsinghua.edu.cn)

(C. Wang).

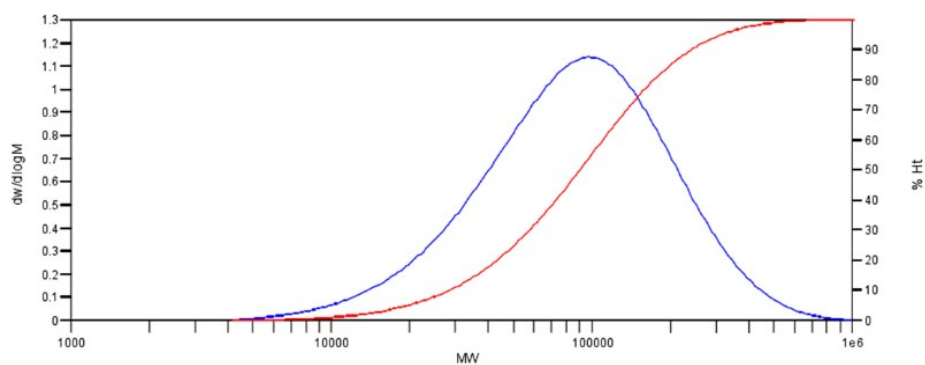

**MW Averages**

| Peak No | Mp    | Mn    | Mw     | Mz     | Mz+1   | Mv     | PD      |
|---------|-------|-------|--------|--------|--------|--------|---------|
| 1       | 99170 | 57061 | 114133 | 196017 | 296756 | 104281 | 2.00019 |

**Figure S1.** GPC data of Mg-PDOL-FEC with THF as the solvent.

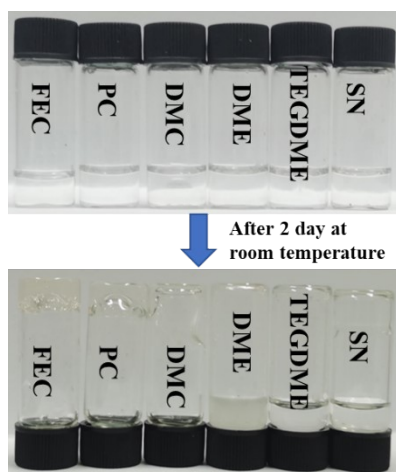

**Figure S2.** Photographs of Mg-PDOL-X electrolyte (1M LiTFSI in DOL:X (1:1=v:v) with 0.5 wt% Mg(OTf)<sub>2</sub>) before and after in-situ polymerization (X=FEC, PC (propylene carbonate) and DMC (Dimethyl carbonate), DME (1,2-Dimethoxyethane), TEGDME (Tetraethyleneglycol dimethyl ether), SN (Succinonitrile)). We can clearly observe that the addition of DME, TEGDME, SN will prevent Mg(OTf)<sub>2</sub> to initiate the polymerization of DOL, while the introduction of FEC, propylene carbonate (PC), Dimethyl carbonate (DMC) and other ester plasticizers will facilitate the polymerization process of DOL.

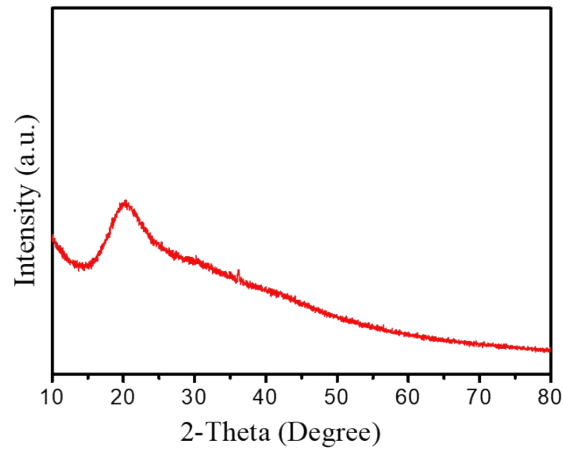

**Figure S3.** XRD of Mg-PDOL-FEC

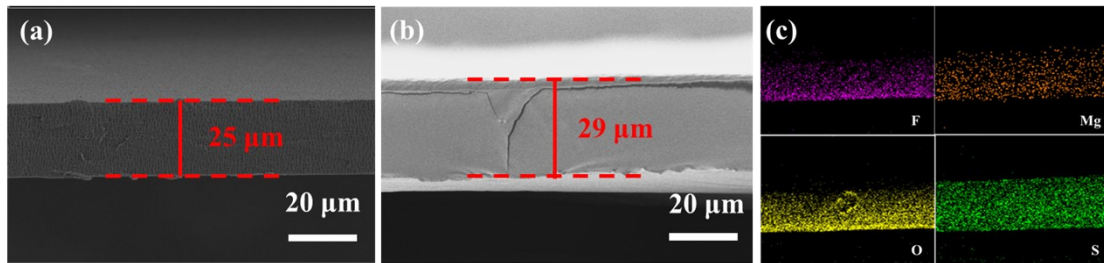

**Figure S4.** (a) SEM images of cross-section of the Celgard 3501 separator. (b) SEM images of cross-section of the Celgard 3501 separator after Mg-PDOL-FEC infiltration. (c) Energy Dispersive Spectroscopy (EDS) mapping images of cross section of the Mg-PDOL-FEC electrolyte after in-situ polymerization.

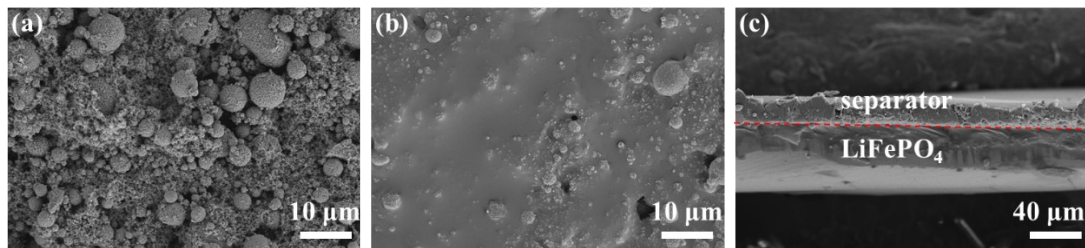

**Figure S5.** (a) SEM image of surface of pristine  $\text{LiFePO}_4$  electrode; (b) SEM image of surface of  $\text{LiFePO}_4$  electrode after in-situ polymerization (Mg-PDOL-FEC sample); (c) SEM images of cross section of  $\text{LiFePO}_4$  electrode after in-situ polymerization (Mg-PDOL-FEC sample).

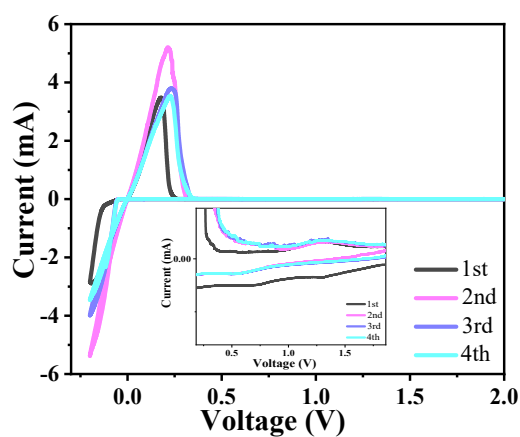

**Figure S6.** CV curves of the Li|DOL-FEC|SS cells.

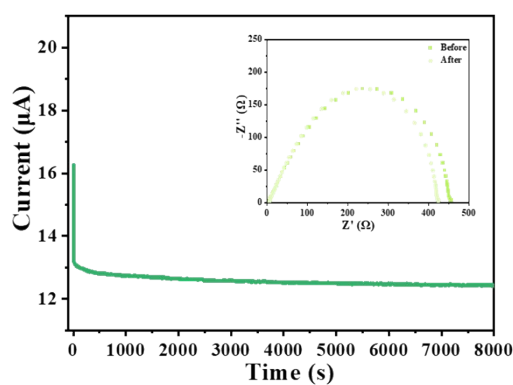

**Figure S7.** Chronoamperometry curves with a step voltage of 10 mV (The insets displayed EIS plot before and after polarization) of cells with Mg-PDOL electrolyte.

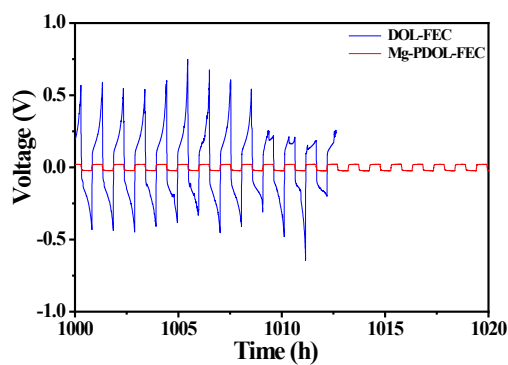

**Figure S8.** Corresponding enlarged voltage plots at  $0.5 \text{ mA cm}^{-2}$  and  $0.25 \text{ mAh cm}^{-2}$  from 1000 to 1020 h.

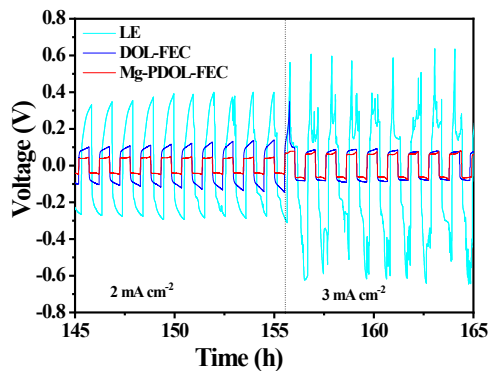

**Figure S9.** Corresponding enlarged voltage plots at different current densities from 145 to 165 h.

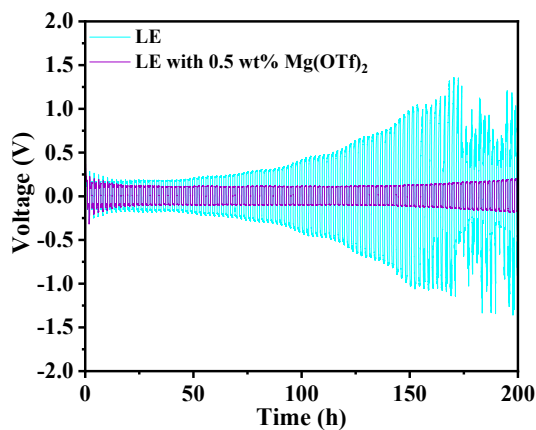

**Figure S10.** Voltage profiles of Li//Li symmetrical cells of LE and LE with 0.5wt% Mg(OTf)<sub>2</sub> electrolyte at 2 mA cm<sup>-2</sup>, 2 mAh cm<sup>-2</sup>.

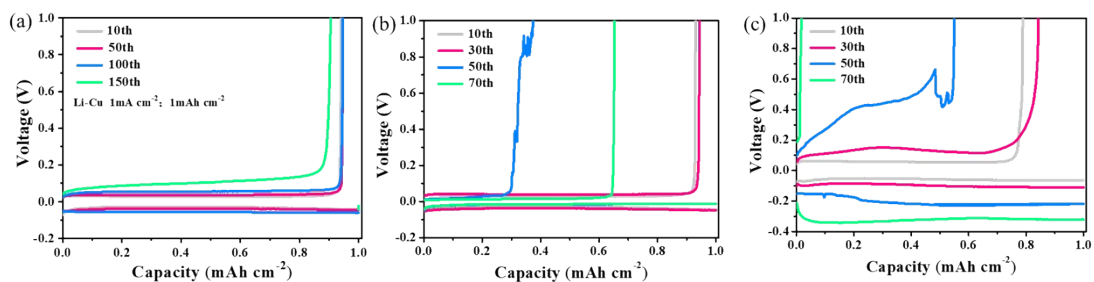

**Figure S11.** Plating/stripping profiles for the Li metal on a Cu foil substrate at 1 mA cm<sup>-2</sup> in (a) Mg-PDOL-FEC, (b) DOL-FEC, and (c) LE;

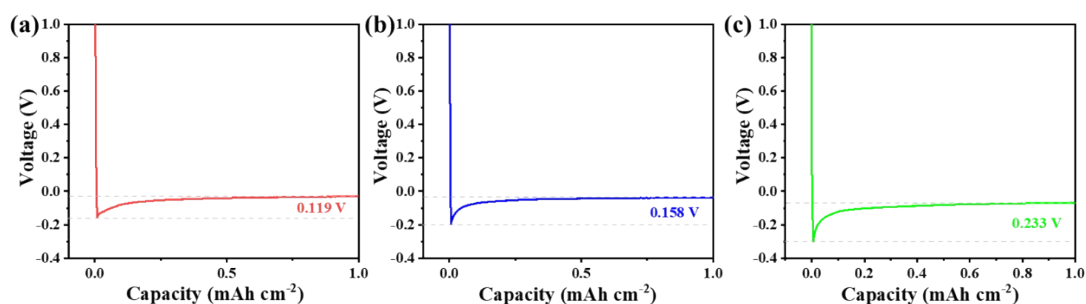

**Figure S12.** Voltage vs time curves of Li plating on Cu foil with Mg-PDOL-FEC, DOL-FEC, and LE electrolyte at  $1 \text{ mA cm}^{-2}$ . The overpotential of the Cu|Mg-PDOL-FEC|Li cell was only 0.119 V, much lower than that of Cu|DOL-FEC|Li cell (0.158 V) and Cu|LE|Li (0.233 V).

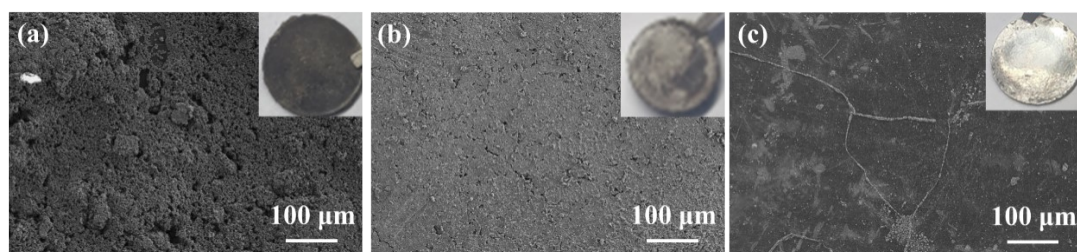

**Figure S13.** The surface SEM images of Li metal anodes, obtained from the Li//Li cells after 100 cycles, cycled in cells with a current density of  $1 \text{ mA cm}^{-2}$ , and  $1 \text{ mAh cm}^{-2}$ . The inset is the digital picture. (a) LE battery. (b) DOL-FEC battery. (c) Mg-PDOL-FEC battery.

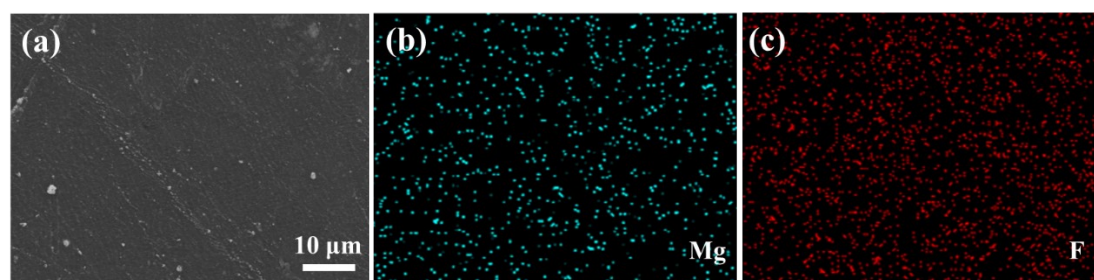

**Figure S14.** (a) The surface SEM images of Li metal anodes disassembled from the Li|Mg-PDOL-FEC|Li battery after 100 cycles with a current density of  $1 \text{ mA cm}^{-2}$ , and  $1 \text{ mAh cm}^{-2}$ . And corresponding EDS element mappings of (b) Mg, (c) F.

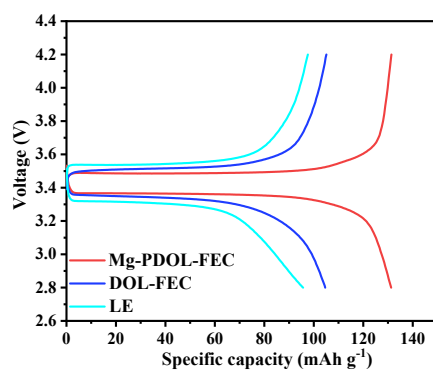

**Figure S15.** Discharge/charge voltage profiles of Li |Mg-PDOL-FEC|LFP full cells at 450th cycle.

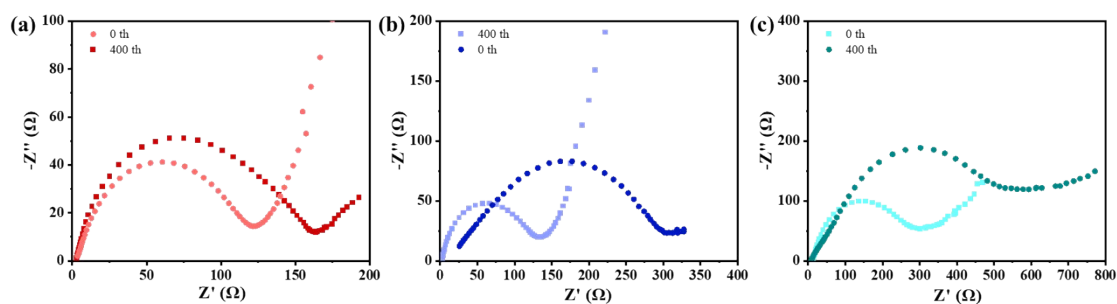

**Figure S16.** AC impedance spectra of Li //LFP cells. (a) Mg-PDOL-FEC; (b) DOL-FEC; (c) LE.

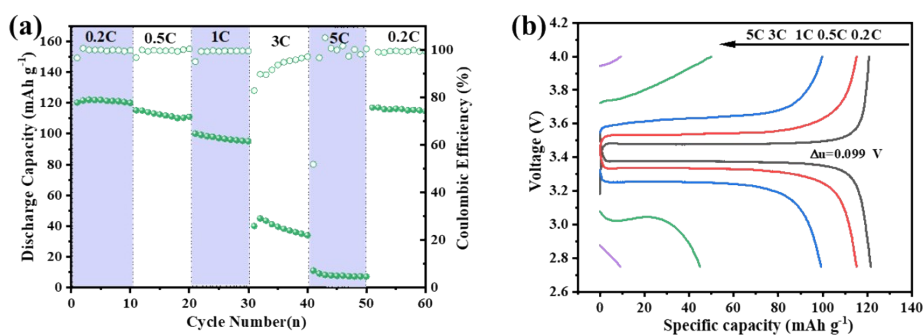

**Figure S17.** Rate performances and typical charge-discharge curves of Li /Mg-PDOL/LFP cells at room temperature.

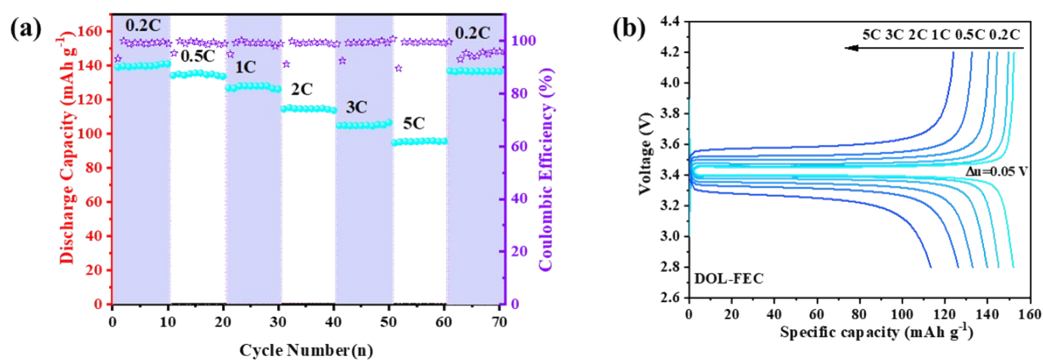

**Figure S18.** Rate performances and typical charge-discharge curves of Li /LE/LFP cells.

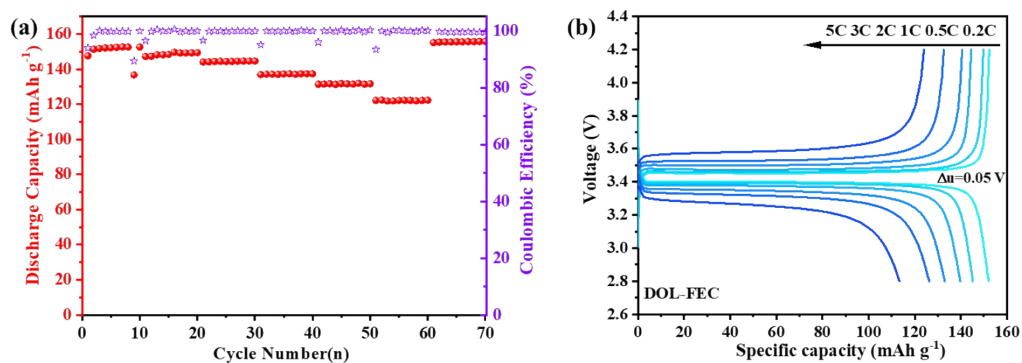

**Figure S19.** Rate performances and typical charge-discharge curves of Li/DOL-FEC/LFP cells.

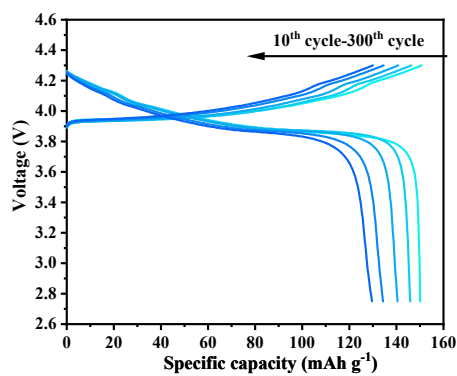

**Figure S20.** Typical charge-discharge curves of the Li/Mg-PDOL-FEC/ LiCoO<sub>2</sub>-CIE cells at 0.5C at RT.



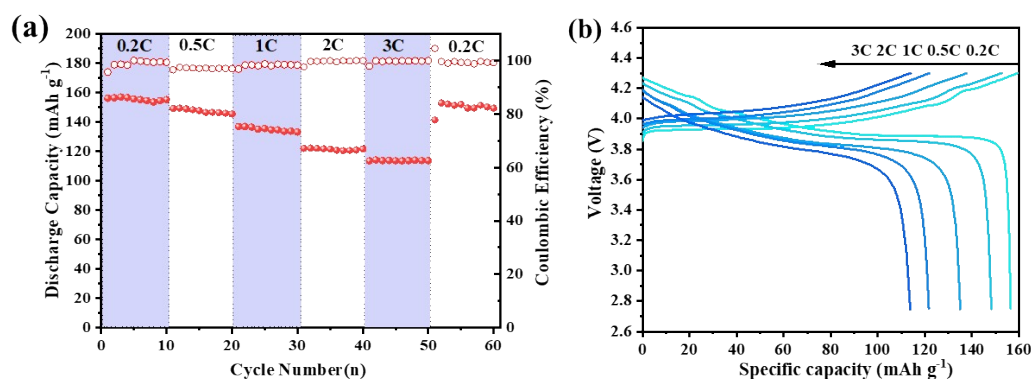

**Figure S21.** Rate performances and typical charge-discharge curves of Li/Mg-PDOL-FEC/ LiCoO<sub>2</sub>-CIE cells.

### Supplementary

**Table S1. Polymerization degree of DOL in the electrolyte from monomer to polymer.**

| Sample              | DOL (g) | 1M LiTFSI (g) | Mg(OTf) <sub>2</sub> | Plasticizer/ (g) | PDOL (g) | Polymerization conversion rate |
|---------------------|---------|---------------|----------------------|------------------|----------|--------------------------------|
| Mg<br>-PDOL-<br>FEC | 0.533   | 0.287         | 0.005                | FEC/0.727        | 0.479    | 90%                            |
| Mg<br>-PDOL-PC      | 0.533   | 0.287         | 0.005                | PC/0.602         | 0.463    | 86%                            |
| Mg<br>-PDOL-<br>DMC | 0.533   | 0.287         | 0.005                | DMC/0.53<br>5    | 0.420    | 79%                            |

The gel polymer is purified through the two-step method of acetone-dissolution and alcohol-precipitation to remove all the LiTFSI and Mg(OTf)<sub>2</sub>, and the liquid phase containing plasticizer and unreacted DOL, and finally the PDOL is obtained. Therefore, the polymerization degree of DOL polymerized can be calculated according to the following equation.

$$\text{Polymerization degree} = \frac{m(\text{PDOL})}{m(\text{DOL})}$$

**Table S2. Comparison of our work with previously reported polyether-based electrolytes via in-situ polymerization**

| Electrolytes (precursors + initiators)                     | Supporting skeleton   | Li//Li cell performance (cycling life; highest current density; polarization voltage) | Li//Cu cell performance (average coulombic efficiency; current density) | Ionic transference number, conductivity               | Battery performance                                                                                                                        | Reference |
|------------------------------------------------------------|-----------------------|---------------------------------------------------------------------------------------|-------------------------------------------------------------------------|-------------------------------------------------------|--------------------------------------------------------------------------------------------------------------------------------------------|-----------|
| 2M LiTFSI/DOL +300 ppm AlI <sub>3</sub> and 600 ppm LiDFOB | Glass fiber           | >4000 h; 1.0 mA cm <sup>-2</sup> , 1.0 mAh cm <sup>-2</sup> at around 15 °C; <50 mV   | 99.08%; 0.1 mA cm <sup>-2</sup>                                         | t <sup>+</sup> =0.62                                  | LiCoO <sub>2</sub> (2~3 mg/cm <sup>2</sup> )-CIE//Li, 45°C, 0.5 C, 700 cycles, capacity retention:89%                                      | [1]       |
| 2M LiTFSI/DOL +3% TB                                       | PP                    | >800 h; 1.0 mA cm <sup>-2</sup> , 1.0 mAh cm <sup>-2</sup> ; <18 mV                   | 98.1%; 0.5 mA cm <sup>-2</sup> , 0.5 mAh cm <sup>-2</sup> ;             | t <sup>+</sup> =0.58; 1.16 mS cm <sup>-1</sup> (30°C) | Li// NCM622 (~4 mg/cm <sup>2</sup> ), 30°C, 0.5 C, 132 mAh g <sup>-1</sup> after 200 cycles; 2C, 122 mAh g <sup>-1</sup> after 1200 cycles | [2]       |
| 1M LiTFSI/DOL +1% LiPF <sub>6</sub> and 1% PLAS            | Commercial separator  | 500 h; 1mA cm <sup>-2</sup> , 1mAh cm <sup>-2</sup> ; <50mV                           | /                                                                       | 0.2 mS cm <sup>-1</sup> (30°C)                        | LiFePO <sub>4</sub> (3mg/cm <sup>2</sup> )/Li, 30°C, 3 C, after 400 cycles, capacity retention :80%, capacity decay rate: 0.05%;           | [3]       |
| 2M LiTFSI/DOL and 30wt% SN+0.3M LiDFOB                     | Glass fiber           | >1000 h; 1 mA cm <sup>-2</sup> , 1 mAh cm <sup>-2</sup> ; <0.25 V                     | 97.9%; 0.1 mA cm <sup>-2</sup> , 0.1mAh cm <sup>-2</sup> ;              | 0.39 mS cm <sup>-1</sup> (RT)                         | LiFePO <sub>4</sub> (~2 mg/cm <sup>2</sup> )/Li, RT, 1 C, 1000 cycles, capacity retention: 83.55%                                          | [4]       |
| 2M LiTFSI/DOL +10 mM                                       | PDA/PVDF-HFP nonwoven | >250 h; 0.5 mA cm <sup>-2</sup> , 1 mAh                                               | /                                                                       | t <sup>+</sup> =0.59; 0.29 mS cm <sup>-1</sup> (25°C) | LiFePO <sub>4</sub> (2.2 mg/cm <sup>2</sup> )/Li, 20°C, 2 C, 800 cycles, capacity                                                          | [5]       |

|                                                                                                                                                                                                                                                                       |                 |                                                                                     |                                                                      |                                                                |                                                                            |                                                                                                                                                                                                                                                                                                                                                                   |      |
|-----------------------------------------------------------------------------------------------------------------------------------------------------------------------------------------------------------------------------------------------------------------------|-----------------|-------------------------------------------------------------------------------------|----------------------------------------------------------------------|----------------------------------------------------------------|----------------------------------------------------------------------------|-------------------------------------------------------------------------------------------------------------------------------------------------------------------------------------------------------------------------------------------------------------------------------------------------------------------------------------------------------------------|------|
| Al(OTf) <sub>3</sub>                                                                                                                                                                                                                                                  |                 | cm <sup>-2</sup> ;<br><25 mV                                                        |                                                                      |                                                                |                                                                            | retention:<br>82.5%; 0.2 C,<br>after 200 cycles,<br>145.4 mA h/g,<br>capacity decay<br>rate: 94.8%                                                                                                                                                                                                                                                                |      |
| 1M<br>LiTFSI/<br>DOL and<br>50wt%<br>DME+4%<br>acid-<br>treated<br>Al <sub>2</sub> O <sub>3</sub><br>2M<br>LiTFSI/<br>DOL<br>+0.3 M<br>AlF <sub>3</sub><br>and 0.2<br>mM<br>Al(OTf) <sub>3</sub><br>1M<br>LiTFSI/<br>DOL<br>and<br>50wt%<br>MP +<br>LiPF <sub>6</sub> | Celgard<br>film | >1000 h;<br>1 mA cm <sup>-2</sup> ,<br>1 mAh<br>cm <sup>-2</sup> ;<br><44 mV        | /                                                                    | /                                                              | t <sup>+</sup> =0.74;3.3<br>7 ×10 <sup>-3</sup> S<br>cm <sup>-1</sup> (RT) | LiFePO <sub>4</sub> (5<br>mg/cm <sup>2</sup> )/Li,RT<br>, 100 mA g <sup>-1</sup> ,<br>from ~140 mAh<br>g <sup>-1</sup> to ~115<br>mAh/g after 200<br>cycles                                                                                                                                                                                                       | [6]  |
|                                                                                                                                                                                                                                                                       | Celgard<br>3501 | /                                                                                   | /                                                                    | mS cm <sup>-1</sup><br>level (RT)                              |                                                                            | NCM622//Li<br>(3mAh/cm <sup>2</sup> ),<br>RT, 0.5 C,30<br>cycles, capacity<br>retention: ><br>80%                                                                                                                                                                                                                                                                 | [7]  |
|                                                                                                                                                                                                                                                                       | Celgard<br>2500 | >2000 h;<br>0.1 mA<br>cm <sup>-2</sup> ,<br>0.1mAh<br>cm <sup>-2</sup> ;            | 94%;<br>0.1 mA<br>cm <sup>-2</sup> ,<br>0.2mAh<br>cm <sup>-2</sup> ; | t <sup>+</sup> =0.61;1.0<br>mS cm <sup>-1</sup><br>(-30 °C)    |                                                                            | LiFePO <sub>4</sub><br>(~2mg/cm <sup>2</sup> )/Li,<br>23°C, 1 C, 134<br>mAh g <sup>-1</sup> after<br>2000 cycles,<br>capacity<br>retention: 89%<br>S<br>(2mg/cm <sup>2</sup> )/Li,<br>RT, 0.1C, 100<br>cycles, capacity<br>retention: 89%;<br>LiFePO <sub>4</sub><br>(5mg/cm <sup>2</sup> )/Li,2<br>3°C, 1 C, no<br>more than 100<br>mA h g-1 after<br>700 cycles | [8]  |
| 2M<br>LiTFSI/<br>DOL<br>+0.5 mM<br>Al(OTf) <sub>3</sub>                                                                                                                                                                                                               | Celgard<br>3501 | >200 h;<br>1 mA cm <sup>-2</sup> ,<br>1 mAh<br>cm <sup>-2</sup> ;                   | ~98%;<br>1 mA cm <sup>-2</sup> ,<br>1 mAh<br>cm <sup>-2</sup> ;      | >1 mS cm <sup>-1</sup>                                         |                                                                            |                                                                                                                                                                                                                                                                                                                                                                   | [9]  |
| 1M<br>LiTFSI/<br>DOL<br>And<br>20wt%                                                                                                                                                                                                                                  | glass fiber     | >900 h;<br>0.5 mA<br>cm <sup>-2</sup> ,<br>0.5 mAh<br>cm <sup>-2</sup> ;<br><45 mV; | /                                                                    | t <sup>+</sup> =0.62;<br>0.24mS<br>cm <sup>-1</sup> (30<br>°C) |                                                                            | LiFePO <sub>4</sub><br>(~2mg/cm <sup>2</sup> )/Li,<br>30 °C, 1C, from<br>135.6 mAh g <sup>-1</sup><br>to 105.7 mAh/g<br>after 1000                                                                                                                                                                                                                                | [10] |



e1905629.

- [8] J. Yu, X. Lin, J. Liu, J. T. T. Yu, M. J. Robson, G. Zhou, H. M. Law, H. Wang, B. Z. Tang, F. Ciucci, *Advanced Energy Materials* **2021**, 12.
- [9] Q. Zhao, X. Liu, S. Stalin, K. Khan, L. A. Archer, *Nature Energy* **2019**, 4, 365.
- [10] Q. Zhang, X. Liu, H. Li, Z. Guo, T. Bian, X. Zhu, N. Zhan, Y. Zhao, *Small* **2022**, 18, e2106395.
- [11] Feng-Quan, Liu, Wen-Peng, Wang, Ya-Xia, Yin, Shuai-Feng, Zhang, Ji-Lei, Shi, *Science Advances* **2018**.
